# Supplementary material
Source: Elsevier journal article supplement (https://www.sciencedirect.com/science/article/pii/S2445147919301043)
Supplement: mmc1 [file S2445147919301043:mmc1.docx]

1. [{(Anexo)}] Additional material

Additional material for this article can be consulted in its electronic format available at <doi:10.1016/j.enfcli.2019.05.004>.

1. [{(Anexo A)}] Complementary material
